# Supplementary material for: High expression of AKR1B10 predicts low risk of early tumor recurrence in patients with hepatitis B virus-related hepatocellular carcinoma
Source: PubMed Central journal article supplement (PMC5299837; doi:10.1038/srep42199), 2017-02-09

## Supplementary Information

### **High expression of AKR1B10 predicts low risk of early tumor recurrence in patients with hepatitis B virus-related hepatocellular carcinoma**

Yan-Yan Wang<sup>1,3,\*</sup>, Lu-Nan Qi<sup>1,2,3,\*</sup>, Jian-Hong Zhong<sup>1,2,3</sup>, Hong-Gui Qin<sup>1,3</sup>, Jia-Zhou Ye<sup>1,2,3</sup>, Shi-Dong Lu<sup>1,3</sup>, Liang Ma<sup>1,2,3</sup>, Xue-Mei You<sup>1,2,3</sup>, Bang-De Xiang<sup>1,2,3</sup>, and Le-Qun Li<sup>1,2,3</sup>

1 Department of Hepatobiliary Surgery, Affiliated Tumor Hospital of Guangxi Medical University, Nanning 530021, PR China

2 Guangxi Cancer Institute, Nanning 530021, PR China

3 Key Laboratory of Early Prevention and Treatment of Regional High-Incidence-Tumors, Ministry of Education, Nanning 530021, PR China

\*These authors contributed equally to this work.

**Correspondence to:** Dr Le-Qun Li (email: wyy857355056@163.com) or Xue-Mei You (email: 397845319@qq.com), Department of Hepatobiliary Surgery, Affiliated Tumor Hospital of Guangxi Medical University, He Di Rd. #71, Nanning 530021, China. Phone: +86-771-5330855. Fax: +86-771-5312000.

**Manuscript type:** original article.

**SUPPLEMENTARY FIGURES**

**Supplementary Figure 1. Full-length blots of AKR1B10 (A) and GAPDH (B)**

**detected by Western blotting assay.**

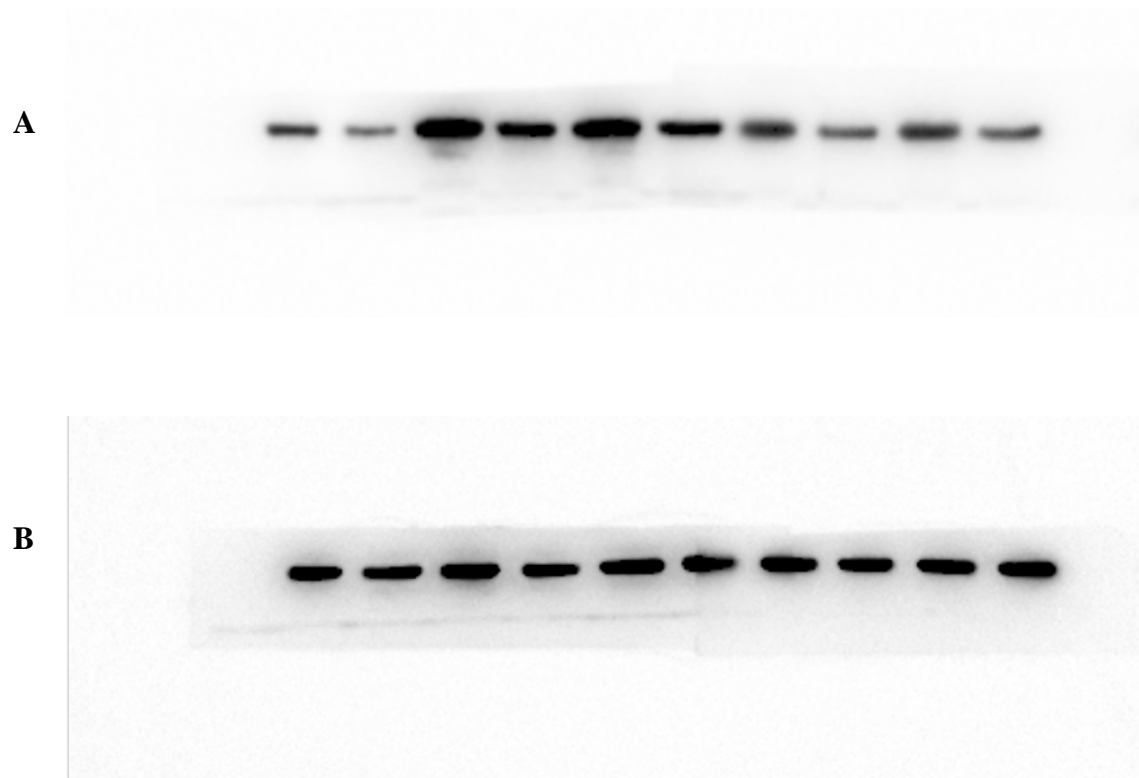

Supplement: srep42199-s1.pdf [file srep42199-s1.pdf]
